# Supplementary material for: Stringency of start codon selection modulates autoregulation of translation initiation factor eIF5
Source: PubMed Central journal article supplement — Nucleic Acids Res. 2011 Dec 7;40(7):2898–906. doi: 10.1093/nar/gkr1192 (PMC3326321; doi:10.1093/nar/gkr1192), 2011-12-07
Supplement: supp_gkr1192_nar-02712-r-2011-File006.pdf [file supp_gkr1192_nar-02712-r-2011-File006.pdf]

## Supplementary Data

**Supplementary Figure S1.** Nucleotide sequences used for generating logograms.

Alignments of the 10 nucleotides surrounding the uAUG start codons of eIF5 that define their initiation contexts are shown for: (A) vertebrates; (B) arthropods; (C) nematodes; (D) molluscs; (E) Pezizomycotina; (F) Basidiomycota; (G) fungi other than Pezizomycotina or Basidiomycota; (H) plants. Species names are on the right. Species names in quotation marks specify presumed contaminant sequences that cluster with eIF5 sequences from an unrelated taxonomic group. Some plants have more than one paralog of eIF5. Here they are arbitrarily labelled “#1”, “#2”, “#3” or “#4” and their placement in one of the groups does not imply orthologous clusters. For each species the sequence on top is the context of the first uAUG and subsequent uAUG contexts are shown in descending order. The initiation codon is highlighted in green. Nucleotides in positions -3 and +4 are highlighted in red if they deviate from the Kozak consensus and in gray if they comply with it. Species names in quotation marks represent sequences derived from Expressed Sequence Tags that by similarity analysis of the main open reading frame do not match eIF5 homologs from the phylum to which the species belongs and instead likely belong to contaminating sequences of unknown species. These sequences are grouped with the taxonomic group to which they actually belong determined by reconstructed phylogenetic trees with the entire sequence.

## A)

### Vertebrata

|     |     |      |                            |
|-----|-----|------|----------------------------|
| GGG | UUU | AUGU | Homo sapiens               |
| UUU | UUC | AUGU |                            |
| UCG | UUU | AUGU |                            |
| GGG | UUU | AUGU | Pan troglodytes verus      |
| UCG | UUU | AUGU |                            |
| UUU | UUC | AUGU |                            |
| GGG | UUU | AUGU | Macaca fascicularis        |
| UUU | UUC | AUGU |                            |
| UCG | UUU | AUGU |                            |
| GGG | UUU | AUGU | Macaca mulatta             |
| UUU | UUC | AUGU |                            |
| UCG | UUU | AUGU |                            |
| GGG | UUU | AUGU | Pongo abelii               |
| UUU | UUC | AUGU |                            |
| UCG | UUU | AUGU |                            |
| GGG | UUU | AUGU | Canis lupus familiaris     |
| UUU | UUC | AUGU |                            |
| UCG | UUU | AUGU |                            |
| GGG | UUU | AUGU | Ursus americanus           |
| UUU | UUC | AUGU |                            |
| UCG | UUU | AUGU |                            |
| GGG | UUU | AUGU | Equus caballus             |
| UUU | UUC | AUGU |                            |
| UCG | UUU | AUGU |                            |
| GGG | UUU | AUGU | Peromyscus polionotus      |
| UUU | UUC | AUGU |                            |
| UCG | UUU | AUGU |                            |
| GGG | UUU | AUGU | Bos taurus                 |
| UUU | UUC | AUGU |                            |
| UCG | UUU | AUGU |                            |
| GGG | UUU | AUGU | Sus scrofa                 |
| UUU | UUC | AUGU |                            |
| UCG | UUU | AUGU |                            |
| GGG | UUU | AUGU | Rattus norvegicus          |
| UUU | UUC | AUGU |                            |
| UCG | UUU | AUGU |                            |
| GGG | UUU | AUGU | Mus musculus               |
| UUU | UUC | AUGU |                            |
| UCG | UUU | AUGU |                            |
| GGG | UUU | AUGU | Cavia porcellus            |
| UUU | UUC | AUGU |                            |
| UCG | UUU | AUGU |                            |
| GGG | UUU | AUGU | Ovis aries                 |
| UUU | UUC | AUGU |                            |
| UCG | UUU | AUGU |                            |
| GGG | UUU | AUGU | Oryctolagus cuniculus      |
| UUU | UUC | AUGU |                            |
| UCG | UUU | AUGU |                            |
| GGG | UUU | AUGU | Taeniopygia guttata        |
| UUU | UUC | AUGU |                            |
| UCG | UUU | AUGU |                            |
| GGG | UUU | AUGU | Gallus gallus              |
| UUU | UUC | AUGU |                            |
| UCG | UUU | AUGU |                            |
| GGG | UUU | AUGU | Lonchura striata domestica |
| UUU | UUC | AUGU |                            |
| UCG | UUU | AUGU |                            |
| GGG | UUU | AUGU | Meleagris gallopavo        |
| UUU | UUC | AUGU |                            |

|      |        |      |                             |
|------|--------|------|-----------------------------|
| UCG  | UUU    | AUGU |                             |
| GGG  | UUU    | AUGU | Bungarus multicinctus       |
| UUU  | UCAUGU |      |                             |
| UCG  | UUU    | AUGU |                             |
| GGG  | UUU    | AUGU | Anolis carolinensis         |
| UUU  | UCAUGU |      |                             |
| UCG  | UUU    | AUGU |                             |
| GUG  | UUU    | AUGU | Xenopus tropicalis          |
| AUU  | UCAUGU |      |                             |
| UCG  | UUU    | AUGU |                             |
| GUG  | UUU    | AUGU | Xenopus laevis              |
| AUU  | UCAUGU |      |                             |
| UUG  | UUU    | AUGU |                             |
| GUG  | UUU    | AUGU | Ambystoma mexicanum         |
| AUU  | UCAUGU |      |                             |
| UUG  | UUU    | AUGU |                             |
| GUG  | UUU    | AUGU | Ambystoma tigrinum tigrinum |
| AUU  | UCAUGU |      |                             |
| UUG  | UUU    | AUGU |                             |
| GUG  | UUU    | AUGU | Cynops pyrrhogaster         |
| AUU  | UCAUGU |      |                             |
| UUG  | UUU    | AUGU |                             |
| GUG  | UUU    | AUGU | Gasterosteus aculeatus      |
| UUU  | UCAUGU |      |                             |
| UCG  | UUU    | AUGU |                             |
| GUG  | UUU    | AUGU | Perca flavescens            |
| UUU  | UCAUGU |      |                             |
| UCG  | UUU    | AUGU |                             |
| GUG  | UUU    | AUGU | Miichthys miiuy             |
| UUU  | UCAUGU |      |                             |
| UCG  | UUU    | AUGU |                             |
| GUG  | UUU    | AUGU | Lates calcarifer            |
| UUU  | UCAUGU |      |                             |
| UCG  | UUU    | AUGU |                             |
| GUG  | UUU    | AUGU | Takifugu rubripes           |
| UUU  | UCAUGU |      |                             |
| UCG  | UUU    | AUGU |                             |
| GUG  | UUU    | AUGU | Siniperca chuatsi           |
| UUU  | UCAUGU |      |                             |
| UCG  | UUU    | AUGU |                             |
| UUG  | UUU    | AUGU | Osmerus mordax #1           |
| UUU  | UCAUGU |      |                             |
| UCG  | UUU    | AUGU |                             |
| GUG  | UUU    | AUGU | Osmerus mordax #2           |
| CGAC | GGAUGG |      |                             |
| UUU  | UCAUGU |      |                             |
| UUG  | UUU    | AUGU |                             |
| GUG  | UUU    | AUGU | Xiphophorus maculatus       |
| UUU  | UCAUGU |      |                             |
| UCG  | UUU    | AUGU |                             |
| GUG  | UUU    | AUGU | Gadus morhua                |
| UUU  | UCAUGU |      |                             |
| CCG  | UUU    | AUGU |                             |
| GUG  | UUU    | AUGU | Oryzias latipes             |
| UUU  | UCAUGU |      |                             |
| UUG  | UUU    | AUGU |                             |
| GUG  | UUU    | AUGU | Lipochromis sp.             |
| AUA  | JUU    | AUGG |                             |
| UUU  | UCAUGU |      |                             |
| UUG  | UUU    | AUGU |                             |
| UUG  | UUU    | AUGU | Salmo salar #1              |

|             |                             |
|-------------|-----------------------------|
| UUUJUCAUGU  |                             |
| UCGUUUUAUGU |                             |
| GUGUUUAUGU  | Salmo salar #2              |
| CGACGGAUGG  |                             |
| UUUJUCAUGU  |                             |
| UCGUUUUAUGU |                             |
| UUGUUUAUGU  | Oncorhynchus mykiss #1      |
| UUUJUCAUGU  |                             |
| UCGUUUUAUGU |                             |
| GUGUUUAUGU  | Oncorhynchus mykiss #2      |
| CGACGGAUGG  |                             |
| UUUJUCAUGU  |                             |
| UCGUUUUAUGU |                             |
| GUGUUUAUGU  | Oncorhynchus tshawytscha #1 |
| UUUJUCAUGU  |                             |
| UCGUUUUAUGU |                             |
| GUGUUUAUGU  | Oncorhynchus tshawytscha #2 |
| CGACGGAUGG  |                             |
| UUUJUCAUGU  |                             |
| UCGUUUUAUGU |                             |
| GUGUUUAUGU  | Oncorhynchus nerka #2       |
| CGACGGAUGG  |                             |
| UUUJUCAUGU  |                             |
| UCGUUUUAUGU |                             |
| UUGUUUAUGU  | Thymallus thymallus         |
| UUUJUCAUGU  |                             |
| UCGUUUUAUGU |                             |
| GUGUUUAUGU  | Esox lucius                 |
| UAACCAAUGU  |                             |
| UGGCUAAUGU  |                             |
| AGUUACAUGU  |                             |
| AUUJUCAUGU  |                             |
| UCGUUUUAUGU |                             |
| GUGUUUAUGU  | Misgurnus anguillicaudatus  |
| UUUJUCAUGU  |                             |
| UUGUUUAUGU  |                             |
| GUGUUUAUGU  | Pimephales promelas #1      |
| UUUJUCAUGU  |                             |
| UUGUUUAUGU  |                             |
| GUGUUUAUGU  | Pimephales promelas #2      |
| CUACGGAUGG  |                             |
| CUUJUCAUGU  |                             |
| UCGUUUUAUGU |                             |
| GUGUUUAUGU  | Danio rerio #2              |
| CUACGGAUGG  |                             |
| CUUJUCAUGU  |                             |
| UCGUUUUAUGU |                             |
| GUGUUUAUGU  | Ictalurus furcatus #1       |
| UUUJUCAUGU  |                             |
| UUGUUUAUGU  |                             |
| GUGUUUAUGU  | Ictalurus furcatus #2       |
| CUGCGGAUGG  |                             |
| AUUJUCAUGU  |                             |
| UCGUUUUAUGU |                             |
| GUGUUUAUGU  | Ictalurus punctatus #1      |
| UUUJUCAUGU  |                             |
| UUGUUUAUGU  |                             |
| GUGUUUAUGU  | Ictalurus punctatus #2      |
| CUGCGGAUGG  |                             |
| AUUJUCAUGU  |                             |
| UCGUUUUAUGU |                             |

|             |                        |
|-------------|------------------------|
| GUGUUUAUGU  | Cynoglossus semilaevis |
| UUUUUCAUGU  |                        |
| UCGUUUUAUGU |                        |
| GUGUUUAUGU  | Squalus acanthias      |
| UUUUUCAUGU  |                        |
| UUGUUUAUGU  |                        |
| GUGUUUAUGU  | Leucoraja erinacea     |
| UUUUUCAUGU  |                        |
| UUGUUUAUGU  |                        |
| GGUUUUUAUGU | Petromyzon marinus     |
| AUUUUUCAUGU |                        |
| GAUUUUUAUGU | Eptatretus burgeri     |
| AUUUUUCAUGU |                        |
| CAGUUUAUGU  |                        |

## B)

### Arthropoda

|             |                              |
|-------------|------------------------------|
| UUUUUAUAUGA | Tribolium castaneum          |
| AGGUGUAUGA  |                              |
| UUUUUAUAUGA | Dendroctonus ponderosae      |
| AGGUGUAUGA  |                              |
| UUUUUAUAUGA | Aedes aegypti                |
| UUGUGCAUGA  |                              |
| UUUUUAUAUGA | Anopheles gambiae            |
| ACGUGCAUGA  |                              |
| UCUUUAUAUGA | Drosophila melanogaster      |
| CUGUGCAUGA  |                              |
| GUACACAUGA  |                              |
| UCUUUAUAUGA | Drosophila willistoni        |
| CUGUGCAUGA  |                              |
| UCUUUAUAUGA | Drosophila serrata           |
| CUGUGCAUGA  |                              |
| GUACACAUGA  |                              |
| UCUUUAUAUGA | Drosophila erecta            |
| CUGUGCAUGA  |                              |
| GUACACAUGA  |                              |
| AAUCUUUAUGA | Drosophila ananassae         |
| UGACUUUAUGA |                              |
| UGGUGCAUGA  |                              |
| GUACACAUGA  |                              |
| UCUUUAUAUGA | Phlebotomus papatasi         |
| UCGUGCAUGA  |                              |
| UCUUUAUAUGA | Phlebotomus sergenti         |
| UCGUGCAUGA  |                              |
| AUUUAUAUGA  | Acyrtosiphon pisum           |
| AGGUGCAUGA  |                              |
| UUUUUAUAUGA | Schistocerca gregaria        |
| ACCUACAUGC  |                              |
| AGGUGUAUGA  |                              |
| UUUUUAUAUGA | Teleopsis dalmanni           |
| UCGUGCAUGA  |                              |
| UUUUUAUAUGA | "Quercus robur"              |
| UCGUGCAUGA  |                              |
| GCGUGUAUGA  | Bombus terrestris            |
| UUUUUAUAUGA | Nilaparvata lugens           |
| AGGUGUAUGA  |                              |
| UUUUUAUAUGA | Parasteatoda tepidariorum    |
| AGGUUUUAUGC |                              |
| UUUUUAUAUGA | "Selaginella moellendorffii" |
| AGGUUUUAUGC |                              |

|             |                              |
|-------------|------------------------------|
| UUUUAUAUGA  | Limulus polyphemus #1        |
| CCGUUUUAUGA |                              |
| UUUUAUAUGA  | Limulus polyphemus #2        |
| UUGUUUAUGA  |                              |
| UUUUAUAUGA  | Rhipicephalus appendiculatus |
| AGGUUUUAUGC |                              |
| CUUGUAUAUGC |                              |
| UUUUAUAUGA  | Amblyomma variegatum         |
| AGGUUUUAUGC |                              |
| UUUGUAUAUGC |                              |
| UUUUAUAUGA  | Loxosceles laeta             |
| AGGUUUUAUGC |                              |
| UUUUGUAUGC  | Campodea fragilis            |
| GAAUUGAUGC  |                              |
| AUUUAUAUGA  | Aphis gossypii               |
| AGGUGCAUGA  |                              |
| UUUUAUAUGA  | Locusta migratoria           |
| GGGUGCAUGA  |                              |
| CUGUGUAUGU  | Calanus finmarchicus         |
| GAUUUUUAUGA | Polypedilum vanderplanki     |
| AAGUGCAUGU  |                              |
| UUUUUCAUGA  | Petrolisthes cinctipes       |
| UCUUGUAUGU  |                              |
| ACUUUCAUGA  | Penaeus monodon              |
| UCUUGUAUGU  |                              |
| ACUUUCAUGA  | Callinectes sapidus          |
| UCUUGUAUGU  |                              |
| UUUUAUAUGA  | Glossina morsitans           |
| UCGUGCAUGA  |                              |
| UUUUAUAUGA  | Ceratitis capitata           |
| UCGUGCAUGA  |                              |
| UCUUAUAUGA  | Rhynchosciara americana      |
| CCUUUUUAUGA | Chironomus tentans           |
| CAGUGCAUGA  |                              |
| UUUUAUAUGA  | Spodoptera frugiperda        |
| GCGUGCAUGA  |                              |
| UUUUAUAUGA  | Spodoptera litura            |
| GCGUGCAUGA  |                              |
| UUUUAUAUGA  | Gryllus bimaculatus          |
| ACCUACAUGC  |                              |
| AGGUGUAUGA  |                              |
| AAACUUUAUGG | Pediculus humanus capitis    |
| ACGUGUAUGA  |                              |

### C)

#### Nematoda

|             |                               |
|-------------|-------------------------------|
| UUGUGCAUGU  | Caenorhabditis remanei        |
| AAUUUUUAUGA |                               |
| CGGUGUAUGC  |                               |
| UUGUGCAUGU  | Caenorhabditis elegans        |
| AAUUUUUAUGA |                               |
| UAGUGUAUGC  |                               |
| UUGUGCAUGU  | Caenorhabditis japonica       |
| AAUUAUAUGA  |                               |
| CAGUGUAUGC  |                               |
| UUGUGCAUGU  | Heterorhabditis bacteriophora |
| GAUUUUUAUGA |                               |
| CAUCGUAUGC  |                               |
| AGUUGCAUGU  | Wuchereria bancrofti          |
| GAUUUUUAUGG |                               |

|            |                             |
|------------|-----------------------------|
| UCACGUAUGC |                             |
| AGUUGCAUGU | Brugia malayi               |
| GAUJUUAUGG |                             |
| UCACGUAUGC |                             |
| AGUUGUAUGU | Ascaris suum                |
| UAUJUUAUGG |                             |
| CCCCGUAUGC |                             |
| UUGUGCAUGU | Angiostrongylus cantonensis |
| AAUJUUAUGC |                             |
| CAUCGUAUGC |                             |
| UUGUGCAUGU | Ancylostoma ceylanicum      |
| GAUJUUAUGC |                             |
| UAUCGUAUGC |                             |
| AGGUGUAUGA | Bursaphelenchus mucronatus  |
| CGUJUUAUGG |                             |
| UAACGUAUGC |                             |

## D)

### Mollusca

|             |                       |
|-------------|-----------------------|
| GUUJUUAUGA  | Lottia gigantean      |
| AGGUJUUAUGA |                       |
| AUUJUUAUGA  | Aplysia californica   |
| GCGJUUAUGA  |                       |
| AUUJUUAUGA  | Aplysia kurodai       |
| GCGJUUAUGA  |                       |
| AUUJUUAUGA  | Lymnaea stagnalis     |
| GCGJUAUGA   |                       |
| GUUJUUAUGA  | Crassostrea gigas     |
| GGGUJUUAUGA |                       |
| GGUJUUAUGA  | Crassostrea virginica |
| GGGUJUUAUGA |                       |
| AGUCGUAUGA  | Mytilus californianus |
| AGUJUUAUGA  |                       |

## E)

### Pezizomycotina

|             |                            |
|-------------|----------------------------|
| UUGJUUAUGU  | Neurospora crassa          |
| GCGJUA AUGC |                            |
| UACCCUAUGU  |                            |
| UUGJUUAUGU  | Podospora anserine         |
| CUGCCCAUGU  |                            |
| CACCACAUGU  |                            |
| GAGJUUAUGC  | Mycosphaerella graminicola |
| GAGJUUAUGC  |                            |
| UGCUGCAUGU  |                            |
| CAGJUUAUGU  | Aureobasidium pullulans    |
| AAUUGCAUGU  |                            |
| CUGUCUAUGU  | Trichophyton rubrum        |
| CUACGCAUGU  |                            |
| UUGJUUAUGU  | Hypocrea jecorina          |
| GAGJUUAUGC  |                            |
| CGCCACAUGU  |                            |
| CUGJUUAUGU  | Gibberella moniliformis    |
| UCGUJUAUGC  |                            |
| UGCCACAUGU  |                            |
| CUAJACAUGA  |                            |
| UUGJUUAUGU  | Thielavia terrestris       |
| GCGJUA AUGC |                            |
| UAAUGCAUGC  |                            |
| UACCCUAUGU  |                            |

|             |                             |
|-------------|-----------------------------|
| CUGUCUAUGU  | Coccidioides posadasii      |
| CUACGCAUGU  |                             |
| UUGUCUAUGU  | Aspergillus niger           |
| CCACGCAUGU  |                             |
| CUGUUUAUGU  | Trichoderma atroviride      |
| GAGUJCAUGC  |                             |
| CUCCCUAUGU  |                             |
| CGCUJCAUGC  |                             |
| UUGUUUAUGU  | Trichoderma virens          |
| UCGUJCAUGC  |                             |
| CGCCCUAUGU  |                             |
| CUCUJGAUGC  |                             |
| CGUUAUAUGU  | Geomyces pannorum           |
| CAACACAUGU  |                             |
| CUCUAUAUGU  |                             |
| GAGUAUAUGU  | Cochliobolus heterostrophus |
| CGCUGUAUGC  |                             |
| UUGCGCAUGU  |                             |
| UUGUUUAUGU  | Ophiostoma piliferum        |
| CAGACAUGC   |                             |
| UUGUJCAUGA  | Tuber melanosporum          |
| CAGUJCAUGC  |                             |
| GGGUUUUAUGU | Cercospora zeae-maydis      |
| UACCGCAUGU  |                             |
| CGUUAUAUGU  | Amorphotheca resinae        |
| CUUCGAAUGU  |                             |
| UUCUGCAUGU  |                             |
| UGUJCCAUGU  |                             |
| UUGUUUAUGU  | "Panicum virgatum"          |
| GCGUJAAUGC  |                             |
| UACCCUAUGU  |                             |
| CGUCUCAUGA  |                             |
| UUGUUUAUGU  | Myceliophthora thermophila  |
| GCGUJAAUGC  |                             |
| UACCCUAUGU  |                             |
| UUGUUUAUGU  | Thielavia heterothallica    |
| GCGUJAAUGC  |                             |
| UACCCUAUGU  |                             |
| CUGUUUAUGU  | Fusarium sporotrichioides   |
| UUGUCUAUGC  |                             |
| UUGUUUAUGU  | "Wrightia tinctoria"        |
| GCGUJAAUGC  |                             |
| UAAUGCAUGC  |                             |
| UACCCUAUGU  |                             |
| UUGUUUAUGU  | Cordyceps militaris         |
| GAGUJCAUGC  |                             |
| AACCUCAUGU  |                             |
| GUCUJCAUGA  |                             |
| UUGUJCAUGA  | "Picea glauca"              |
| CGGUJCAUGC  |                             |
| UUGUUUAUGU  | Sordaria macrospora         |
| GCGUJAAUGC  |                             |
| UACCCUAUGU  |                             |
| CUGUUUAUGU  | Magnaporthe oryzae          |
| GCGUJCAUGC  |                             |
| UCCCUAUGU   |                             |
| CAGUCUAUGU  |                             |
| CUGUUUAUGU  | Magnaporthe poae            |
| GCGUJCAUGC  |                             |
| UCCCUAUGU   |                             |
| AAGUJCAUGU  |                             |



|             |                         |
|-------------|-------------------------|
| CUGUUUAUGU  | Gaeumannomyces graminis |
| GCGUUCAUGC  |                         |
| UCCCUUAUGU  |                         |
| AAGUUCAUGU  |                         |
| UUGUUUAUGU  | Trichoderma reesei      |
| GAGUUCAUGC  |                         |
| CGCCACAUGC  |                         |
| CUCUUGAUGC  |                         |
| CUGUUUAUGU  | Nectria haematococca    |
| UUGUCUAUGC  |                         |
| UGCCACAUGC  |                         |
| CUCUUCAUGA  |                         |
| CAGUUUAUGU  | Glomerella graminicola  |
| GAGUUCAUGA  |                         |
| UACCACAUGC  |                         |
| UUCUUAUGC   |                         |
| CUGUUUAUGU  | Gibberella zeae         |
| CUGUCUAUGC  |                         |
| UGCCACAUGA  |                         |
| CUAUACAUGA  |                         |
| UUGUCUAUGU  | Neosartorya fischeri    |
| CUACGCAUGU  |                         |
| CUGUUUAUGU  | Fusarium oxysporum      |
| UCGUUCUAUGC |                         |
| UGCCACAUGC  |                         |
| CUAUACAUGA  |                         |
| CUGUUUAUGU  | Verticillium dahliae    |
| GAGUUCAUGU  |                         |
| UACCCCAUGU  |                         |
| UCUUCCAUGU  |                         |
| UUGUCUAUGU  | Aspergillus fumigatus   |
| UGCUGUAUGA  |                         |
| CUACGCAUGU  |                         |
| UUGUUUAUGU  | Grosmannia clavigera    |
| GCGUUCAUGC  |                         |
| UCCCUUAUGU  |                         |
| UUCUUCAUGC  |                         |
| UUGUCUAUGU  | Aspergillus clavatus    |
| CUACGCAUGU  |                         |
| CGUUUAUGU   | Geomyces destructans    |
| CAACACAUGC  |                         |
| CUCUAUAUGU  |                         |
| CUGUUUAUGU  | Metarhizium acridum     |
| GAGUUCAUGC  |                         |
| UGCCCAUGU   |                         |
| ACCUUCAUGC  |                         |
| CUGUUCAUGU  | Talaromyces stipitatus  |
| UACCGCAUGU  |                         |
| UUGUCUAUGU  | Aspergillus terreus     |
| UGACGCAUGU  |                         |
| CGUUUAUGU   | Botryotinia fuckeliana  |
| AUUCGAAUGU  |                         |
| UUCUGCAUGU  |                         |
| UUGUCUAUGU  | Aspergillus nidulans    |
| CGGCGUAUGU  |                         |
| CGUUUAUGU   | Blumeria graminis       |
| CGGCGAAUGU  |                         |
| CAUCAUAUGU  |                         |
| UUGUCUAUGU  | Aspergillus flavus      |
| AUACGCAUGU  |                         |
| GAGUAUAUGU  | Pyrenophora teres       |

|             |                              |
|-------------|------------------------------|
| CGCUGUAUGC  |                              |
| CUGC GCAUGU |                              |
| GAGUAUAUGU  | Pyrenophora tritici-repentis |
| CGCUGUAUGC  |                              |
| CUGC GCAUGU |                              |
| CUGUJCAUGU  | Penicillium marneffeii       |
| UACCGCAUGU  |                              |
| CUGUUUAUGU  | Epichloe festucae            |
| GAGUJCAUGC  |                              |
| UGCCCUAUGU  |                              |
| GUGUUUAUGU  |                              |
| CGGUAUAUGU  | Phaeosphaeria nodorum        |
| UACUGCAUGU  |                              |
| CGUUAUAUGU  | Sclerotinia sclerotiorum     |
| AUUCGAAUGU  |                              |
| UUCUGCAUGU  |                              |
| CUGUUUAUGU  | Verticillium albo-atrum      |
| GAGUJCAUGU  |                              |
| UACCCAUGU   |                              |
| UCUJCCAUGU  |                              |
| CUGUUUAUGU  | Metarhizium anisopliae       |
| GAGUJCAUGC  |                              |
| UGCCCAUGU   |                              |
| AUCUJCAUGC  |                              |

**F)**  
**Basidiomycota**

|             |                             |
|-------------|-----------------------------|
| GGAUACAUGC  | Postia placenta             |
| GGAUJCAUGC  | Trametes versicolor         |
| GGAUJCAUGC  | Phanerochaete chrysosporium |
| GGAUJCAUGC  | Heterobasidion annosum      |
| GGAUJCAUGC  | Pleurotus ostreatus         |
| GGAUJCAUGC  | Schizophyllum commune       |
| GGAUJCAUGC  | Lentinula edodes            |
| GAAUJCAUGC  | Coprinopsis cinerea         |
| GGAUJCAUGC  | Gloeophyllum trabeum        |
| CGGUJCAUGC  | Leucosporidium scottii      |
| CAGCUUAUGU  | Microbotryum violaceum      |
| UCGUJCAUGU  | Melampsora larici-populina  |
| GAGUJCAUGC  | Tremella mesenterica        |
| GAGUJCAUGC  | Cryptococcus neoformans     |
| UUGUJCAUGC  | Cryptococcus laurentii      |
| UCGUUAUAUGU | Phakopsora pachyrhizi       |
| GUUUUAUGU   | Ustilago maydis             |
| AAUJCAUGC   | Paxillus involutus          |

**G)**  
**Other fungi**

|            |                          |
|------------|--------------------------|
| UAGUJCAUGU | Cunninghamella elegans   |
| UUGUACAUGU | Mucor circinelloides     |
| CUGUJCAUGU | Phycomyces blakesleeanus |
| CGCUJCAUGU | Glomus intraradices      |
| CUGUACAUGU | Piromyces sp.            |
| CGCUJCAUGA | Spizellomyces punctatus  |

**H)**  
**Plants**

|            |                 |
|------------|-----------------|
| UCUUUAUGU  | Oryza sativa #1 |
| UGCUJCAUGC |                 |

|             |                          |
|-------------|--------------------------|
| CAAUUUAUGC  |                          |
| UCUUUUUAUGU | Oryza sativa #2          |
| UCUUUUUAUGU | Sorghum bicolour #1      |
| CACUGCAUGC  |                          |
| UCUUUUUAUGU | Sorghum bicolour #2      |
| CACUGCAUGC  |                          |
| UCUUUUUAUGU | Populus trichocarpa #1   |
| GGCUGCAUGC  |                          |
| GCUUUUAUGU  | Populus trichocarpa #2   |
| AGCUGUAUGC  |                          |
| UUUUUUUAUGU | Populus trichocarpa #3   |
| ACACAGAUGC  |                          |
| UCUUUUUAUGU | Populus tremula #1       |
| GGCUGUAUGC  |                          |
| UGUUUUUAUGA |                          |
| GCUUUUAUGU  | Populus tremula #2       |
| AGCUGUAUGC  |                          |
| UCUUUUUAUGU | Populus deltoids #1      |
| GGCUGCAUGC  |                          |
| UUUUUUUAUGU | Populus deltoides #3     |
| AGCUAUAUGC  |                          |
| UCUUUUUAUGU | Populus nigra #1         |
| GGCUGCAUGC  |                          |
| UUUUUUUAUGU | Populus nigra #3         |
| ACACAGAUGC  |                          |
| AGCUAUAUGC  |                          |
| GCUUUUAUGU  | Populus fremontii #2     |
| AGCUGUAUGC  |                          |
| UCUUUUUAUGU | Zea mays #1              |
| CACUGCAUGC  |                          |
| UCUUUUUAUGU | Zea mays #2              |
| CACUGCAUGC  |                          |
| UCUUUUUAUGU | Arabidopsis thaliana     |
| CAGUUUAUGC  |                          |
| UCUUUUUAUGU | Vitis vinifera #1        |
| AGCUGCAUGC  |                          |
| AGGUUUUAUGU |                          |
| UCUUUUUAUGU | Vitis vinifera #2        |
| GACUGUAUGC  |                          |
| AGCUGGAUGC  |                          |
| UCUUUUUAUGU | Vitis shuttleworthii #1  |
| AGCUGCAUGC  |                          |
| AGGUUUUAUGU |                          |
| UCUUUUUAUGU | Vitis shuttleworthii #2  |
| GACUGUAUGC  |                          |
| AGCUGGAUGC  |                          |
| GCUUUUAUGU  | Crocus sativus           |
| GACUGCAUGA  |                          |
| UCGUUCAUGC  |                          |
| UCUUUUUAUGU | Nicotiana tabacum #1     |
| GACUGUAUGC  |                          |
| UCUUUUUAUGU | Nicotiana tabacum #2     |
| GACUGUAUGC  |                          |
| UCUUUUUAUGU | Nicotiana tabacum #3     |
| GGCUGCAUGC  |                          |
| UCUUUUUAUGU | Nicotiana benthamiana #2 |
| GACUUUAUGC  |                          |
| UUUUUUUAUGU | Nicotiana benthamiana #3 |
| GGCUGCAUGC  |                          |
| UCUUUUUAUGU | Amborella trichopoda     |
| ACUCAGAUGC  |                          |

|             |                         |
|-------------|-------------------------|
| AGAUGCAUGC  |                         |
| ACUJUAAUGC  |                         |
| UCUJUUAUGU  | Quercus petraea         |
| GGCUGCAUGC  |                         |
| UGGJAAAUGA  |                         |
| UCUJUUAUGU  | Petunia axillaris       |
| GACUGUAUGC  |                         |
| UCUJUUAUGU  | Petunia x hybrida       |
| GACUGUAUGC  |                         |
| UCUJUUAUGU  | Quercus robur           |
| GGCUGUAUGC  |                         |
| AGUJUGAUGG  |                         |
| UCUJUUAUGU  | Triticum aestivum #1    |
| CCCUGCAUGC  |                         |
| UCUJUUAUGU  | Triticum aestivum #2    |
| CCCUGCAUGC  |                         |
| UCUJUUAUGU  | Triticum aestivum #3    |
| CCCUGCAUGC  |                         |
| UCUJUUAUGU  | Lolium multiflorum      |
| CCCUGUAUGC  |                         |
| UCUJUUAUGU  | Lolium perenne          |
| CCCUGUAUGC  |                         |
| UCUJUUAUGU  | Lolium temulentum       |
| CCCUGUAUGC  |                         |
| UCUJUUAUGU  | Avena sativa #1         |
| CCCUGUAUGC  |                         |
| UCUJUUAUGU  | Avena sativa #2         |
| CCCUGUAUGC  |                         |
| UCUJUUAUGU  | Avena barbata           |
| CCCUGUAUGC  |                         |
| UCUJUUAUGU  | Festuca pratensis       |
| CCCUGUAUGC  |                         |
| UCUJUUAUGU  | Festuca arundinacea     |
| CCCUGUAUGC  |                         |
| UCUJUUAUGU  | Hordeum vulgare #1      |
| CCCUGCAUGC  |                         |
| UCUJUUAUGU  | Hordeum vulgare #2      |
| CCCUGCAUGC  |                         |
| UCUJUUAUGU  | Brachypodium distachyon |
| CCCUGCAUGC  |                         |
| UUUJUUAUGU  | Lactuca sativa #1       |
| CUUJAAUUGC  |                         |
| AUUJUUAUGU  | Lactuca sativa #2       |
| ACCUJUAUGC  |                         |
| GCUJUUAUGU  | Iris brevicaulis        |
| CGCUGCAUGC  |                         |
| UCGUJUUAUGC |                         |
| UCUJUUAUGU  | Cynodon dactylon        |
| CACUGCAUGC  |                         |
| UCUJUUAUGU  | Zostera marina          |
| UGUUGCAUGA  |                         |
| AGUUGGAUGC  |                         |
| UCUJUUAUGU  | Dioscorea alata         |
| GGCUGCAUGC  |                         |
| UCUJUUAUGU  | Prunus persica #1       |
| AGCUGUAUGC  |                         |
| AGUJUCAUGG  |                         |
| UAUJUUAUGU  | Prunus persica #2       |
| AUUUGGAUGC  |                         |
| GGAUGCAUGC  |                         |
| CGGUJUUAUGC |                         |

|            |                         |
|------------|-------------------------|
| UCUUUUAUGU | Solanum torvum          |
| GGCUGUAUGC |                         |
| UCUUUUAUGU | Solanum lycopersicum #1 |
| GACUGUAUGC |                         |
| UCUUUUAUGU | Solanum lycopersicum #3 |
| UAUUGUAUGU |                         |
| GGGUGAUGA  |                         |
| GACUGUAUGC |                         |
| UCUUUUAUGU | Solanum tuberosum #1    |
| AACUGUAUGC |                         |
| UCUUUUAUGU | Solanum tuberosum #2    |
| GACUGUAUGC |                         |
| UCUUUUAUGU | Solanum tuberosum #3    |
| GACUGUAUGC |                         |
| UCUUUUAUGU | Solanum chacoense       |
| GACUGUAUGC |                         |
| UCUUUUAUGU | Actinidia deliciosa #1  |
| GACUGUAUGC |                         |
| UCUUUUAUGU | Actinidia arguta #2     |
| GACUGUAUGC |                         |
| UCUUUUAUGU | Actinidia arguta #3     |
| GACUGUAUGC |                         |
| UCUUUUAUGU | Actinidia chinensis #1  |
| GACUGUAUGC |                         |
| UCUUUUAUGU | Actinidia chinensis #2  |
| GACUGUAUGC |                         |
| UCUUUUAUGU | Liriodendron tulipifera |
| GGUGUCAUGC |                         |
| AGUUGCAUGC |                         |
| UCUUUUAUGU | Agrostis capillaris     |
| CCCUGUAUGC |                         |
| UUUJUUAUGU | Jatropha curcas         |
| GGCUGCAUGC |                         |
| CAGJUUAUGC |                         |
| UCUUUUAUGU | Ricinus communis        |
| GCCUGCAUGC |                         |
| CAGJUUAUGC |                         |
| UUUJCCAUGC | Limnanthes alba         |
| UCUJUUAUGU |                         |
| UGCUGUAUGC |                         |
| AUUJUAUGG  |                         |
| UUUJUUAUGU | Carthamus tinctorius    |
| GGCUGUAUGC |                         |
| UUUJUUAUGU | Euphorbia esula         |
| AUCUGCAUGC |                         |
| CAGJUUAUGC |                         |
| UCUJUUAUGU | Coffea arabica          |
| GACUGCAUGC |                         |
| AGUUGUAUGA |                         |
| UCUJUUAUGU | Coffea canephora        |
| GACUGCAUGC |                         |
| AGUUGUAUGA |                         |
| UCUJUUAUGU | Theobroma cacao         |
| AUCUGCAUGC |                         |
| UUUJUUAUGU | Fagus sylvatica         |
| GGCUGUAUGC |                         |
| AGUUGAUGG  |                         |
| UCUJUUAUGU | Triphysaria pusilla     |
| CCGUAUUGU  |                         |
| UCUJUUAUGU | Ficus elastica          |
| AGCUGUAUGC |                         |

|             |                       |
|-------------|-----------------------|
| CUGUUUAUGC  |                       |
| UCUUUUUAUGU | Manihot esculenta     |
| GGCUGCAUGC  |                       |
| CAGUUUAUGU  |                       |
| UCUUUUUAUGU | Carica papaya         |
| AGCUGCAUGC  |                       |
| CAGUUUAUGC  |                       |
| UAUUUUUAUGU | Malus x domestica     |
| UACUUGAUGA  |                       |
| AGUUGAAUGC  |                       |
| CAAUUUUAUGC |                       |
| UCUUUUUAUGU | Citrus clementina #1  |
| GGCUGUAUGC  |                       |
| UUUUUUUAUGU | Citrus clementina #2  |
| GGCUGCAUGC  |                       |
| CUGUUUAUGC  |                       |
| UCUUUUUAUGU | Citrus sinensis       |
| GGCUGUAUGC  |                       |
| UCUUUUUAUGU | Citrus reticulata     |
| GGCUGUAUGC  |                       |
| UCUUUUUAUGU | Citrus aurantium      |
| GGCUGUAUGC  |                       |
| UCUUUUUAUGU | Citrus trifoliata     |
| GGCUGUAUGC  |                       |
| UCUUUUUAUGU | Diospyros kaki        |
| GGCUGCAUGC  |                       |
| UCGUUAUGC   |                       |
| UUUUUUUAUGU | Beta vulgaris         |
| AGUUGUAUGC  |                       |
| AAUUUUUAUGC |                       |
| UCUUUUUAUGU | Euonymus alatus       |
| GCCUGCAUGA  |                       |
| CGUUUUUAUGC |                       |
| UAUUUUUAUGU | Rubus ulmifolius      |
| AGUUGAAUGC  |                       |
| CAAUUUUAUGC |                       |
| UCUUUUUAUGU | Gossypium raimondii   |
| AUCUGCAUGC  |                       |
| CAUUUUUAUGC |                       |
| UCUUUUUAUGU | Gossypium hirsutum #1 |
| AUCUGCAUGC  |                       |
| CAUUUUUAUGC |                       |
| UCUUUUUAUGU | Gossypium hirsutum #2 |
| AGCUGCAUGC  |                       |
| CGUUUUUAUGC |                       |
| UCUUUUUAUGU | Gossypium hirsutum #3 |
| AUCUGCAUGC  |                       |
| UCUUUUUAUGU | Gossypium arboreum #1 |
| AUCUGCAUGC  |                       |
| CAUUUUUAUGC |                       |
| UCUUUUUAUGU | Gossypium arboreum #2 |
| AGCUGCAUGC  |                       |
| CGUUUUUAUGC |                       |
| UCUUUUUAUGU | Gossypium arboreum #3 |
| AUCUGCAUGC  |                       |
| UCUUUUUAUGU | Gossypium barbadense  |
| AUCUGCAUGC  |                       |
| CAUUUUUAUGC |                       |
| UCUUUUUAUGU | Panax ginseng         |
| CAUCUUAUGA  |                       |
| GGCUGCAUGC  |                       |

|        |         |                          |
|--------|---------|--------------------------|
| CAGCUC | AUGC    |                          |
| UCU    | UUUAUGU | Capsicum annuum          |
| GAC    | UGUAUGC |                          |
| UCU    | UUUAUGU | Catharanthus roseus      |
| GAC    | UGUAUGC |                          |
| UAU    | UUUAUGU | Cannabis sativa          |
| GGC    | UGUAUGC |                          |
| AAG    | UGUAUGC |                          |
| UCU    | UUUAUGU | Aquilegia formosa        |
| GAC    | UGCAUGC |                          |
| UAU    | UUUAUGU |                          |
| CCU    | UUUAUGU | Ipomoea nil              |
| GGC    | UGCAUGC |                          |
| UCU    | UUUAUGU | Striga hermonthica       |
| GGC    | UGCAUGC |                          |
| CAU    | UUUAUGU |                          |
| CCU    | UUUAUGU | Cucumis melo             |
| GGC    | UGCAUGC |                          |
| CAU    | UUUAUGU |                          |
| UUU    | UUUAUGU | Barnadesia spinosa #1    |
| GGC    | UGUAUGC |                          |
| UCU    | UUUAUGU | Barnadesia spinosa #2    |
| GGC    | UGUAUGC |                          |
| UCG    | UUUAUGU | Elaeis oleifera          |
| GGC    | UGCAUGC |                          |
| UAU    | UGUAUGC |                          |
| UUU    | UUUAUGU | Wrightia tinctoria       |
| GAC    | UGUAUGC |                          |
| AGU    | UCAUGG  |                          |
| UUU    | UUUAUGU | Cynara cardunculus       |
| GGC    | UGUAUGC |                          |
| UUU    | UUUAUGU | Taraxacum kok-saghyz     |
| ACC    | UGCAUGC |                          |
| UCU    | UUUAUGU | Mimulus guttatus         |
| AGC    | UGCAUGA |                          |
| UCU    | UUUAUGU | Brassica napus #1        |
| UCU    | UUUAUGU | Brassica napus #2        |
| UCU    | UUUAUGU | Brassica oleracea #2     |
| UCU    | UUUAUGU | Brassica rapa #2         |
| UCU    | UUUAUGU | Eucalyptus globulus      |
| UGU    | UGGAUGC |                          |
| GGG    | UUUAUGC |                          |
| AUU    | UUUAUGU | Helianthus petiolaris    |
| GGC    | UGUAUGC |                          |
| AUU    | UUUAUGU | Helianthus exilis        |
| GGC    | UGUAUGC |                          |
| UCU    | UCAUGU  | Glycine max #1           |
| AGC    | UGUAUGC |                          |
| UCU    | UCAUGU  | Glycine max #2           |
| AGU    | UGUAUGA |                          |
| UCU    | UCAUGU  | Glycine max #3           |
| AGU    | UGUAUGA |                          |
| UCU    | UCAUGU  | Glycine max #4           |
| ACC    | UGUAUGC |                          |
| UCU    | UCAUGU  | Phaseolus coccineus      |
| AGC    | UUUAUGC |                          |
| UCU    | UCAUGU  | Phaseolus vulgaris #1    |
| AGC    | UGUAUGC |                          |
| UCU    | UCAUGU  | Phaseolus vulgaris #2    |
| AGC    | UGUAUGC |                          |
| UCU    | UCAUGU  | Phaseolus acutifolius #1 |

|      |          |                            |
|------|----------|----------------------------|
| AGCU | GCAUGC   |                            |
| UCUU | JUCAUGU  | Phaseolus acutifolius #2   |
| AGCU | JGUAUGC  |                            |
| UUUU | JUU AUGU | Guizotia abyssinica        |
| GCCU | JGUAUGC  |                            |
| UCUU | JUCAUGU  | Vigna unguiculata          |
| AUCU | JGUAUGC  |                            |
| UCUU | JUU AUGU | Leymus cinereus            |
| CCCU | JGCAUGC  |                            |
| UCUU | JUU AUGU | Pinus taeda                |
| GGUU | JGGAUGC  |                            |
| GCCU | JGUAUGC  |                            |
| AGUU | JGGAUGC  |                            |
| UCUU | JUU AUGU | Pinus radiata              |
| GGUU | JGGAUGC  |                            |
| GCCU | JGUAUGC  |                            |
| AGUU | JGGAUGC  |                            |
| CCUU | JUU AUGU | Pinus banksiana            |
| UUGU | JUU AUGU |                            |
| GAAU | JAAAUGU  |                            |
| UUUU | JGCAUGC  |                            |
| UCUU | JUU AUGU | Pinus contorta             |
| GGUU | JGGAUGC  |                            |
| AGUU | JGGAUGC  |                            |
| UCUU | JUU AUGU | Picea sitchensis           |
| GCCU | JGUAUGC  |                            |
| GCCU | JAU AUGA |                            |
| AGUU | JGGAUGC  |                            |
| UCUU | JUU AUGU | Picea glauca               |
| GCCU | JGUAUGC  |                            |
| AGUU | JGGAUGC  |                            |
| UCUU | JUU AUGU | Picea engelmannii          |
| GCCU | JGUAUGC  |                            |
| AGUU | JGGAUGC  |                            |
| UCUU | JUU AUGU | Selaginella moellendorffii |
| UGC  | JGCAUGC  |                            |
| UCUU | JUU AUGU | Selaginella lepidophylla   |
| GCCU | JGCAUGC  |                            |
| GAGU | JUCAUGC  |                            |
| UCUU | JUU AUGU | Physcomitrella patens      |
| GGUU | JGCAUGC  |                            |



**Supplementary Figure S2.** Weblogo representation of amino acid conservation in eIF5 uORF1 encoded peptides.

Letter heights are proportional to the frequency of conservation of each amino acid at each position. Each line represents a different eukaryotic branch which is indicated in parentheses on the right followed by the number of sequences used in each alignment. The sequences used to generate the alignment presented in this figure are available upon request.



**Supplementary Figure S3.** Removing eIF5 uORFs results in constitutive eIF5 expression. (A) Western blots of protein lysates from cells transfected in triplicate with the eIF5 or eIF1 overexpression constructs indicated in Figure 2B of the main text. The eIF1 overexpression construct is the “eIF1 good\*” described previously (2). In lanes marked “10×”, 10-fold more vector with insert was transfected compared with lanes marked “1×,” where the difference in the amount of transfecting DNA is made up with the inert vector pcDNA3 (2). The control cells are transfected with “10×” amount of pcDNA3. The blot shown was probed with anti-eIF5 and anti- $\beta$ -actin followed by anti-eIF1. The corresponding detected proteins are indicated by arrows. (B & C) Densitometry analysis of the western blot shown in A. Relative eIF5 levels (B) and eIF1 levels (C) were determined by normalizing to  $\beta$ -actin levels.

Supplementary Figure S3

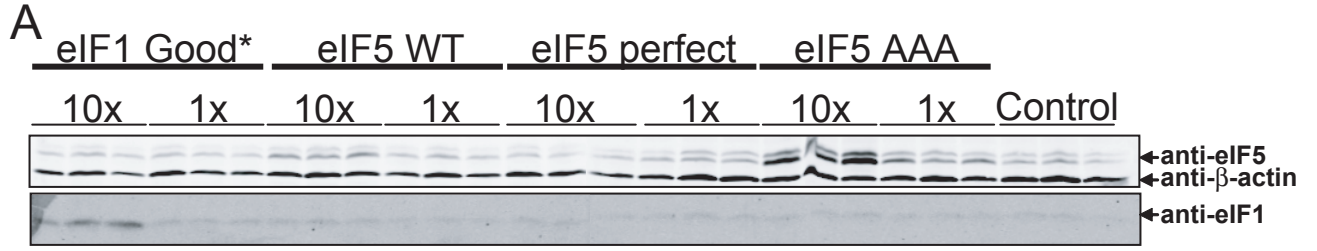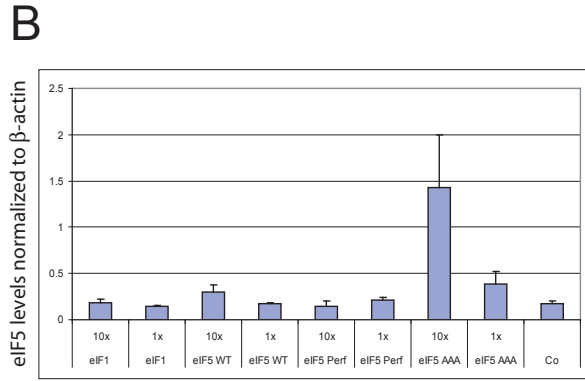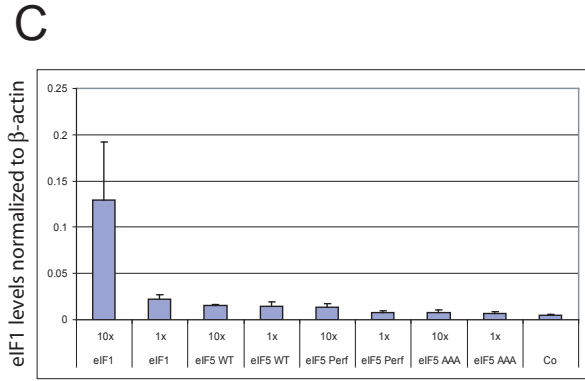

## Supplementary Table S1.

### Oligonucleotides used in this study.

|    |                                    |                                                                |
|----|------------------------------------|----------------------------------------------------------------|
| 1  | eIF5 wt S PstI                     | ATAACTGCAGCCAGCCAATGGGCAGTGAGG                                 |
| 2  | eIF5 wt AS 5' intron               | AACCTTGATACTTACCGTTTTTCGTCAAATAAAGACATAAACCCAACGC              |
| 3  | eIF5 wt S 3' intron                | TTTCTCTCCACAGAGCTGTTGCGCAGCCATTGG                              |
| 4  | eIF5 wt AS BamHI                   | TTATGGATCCAGACATTTTGGCTTATTAGTGG                               |
| 5  | eIF5 wt S 5' intron                | TTTATTTGACGAAAACGGTAAGTATCAAGGTTAC                             |
| 6  | eIF5 wt AS 3' intron               | AATGGCTGCGCAACAGCTCTGTGGAGAGAAAGG                              |
| 7  | eIF5 wt S                          | AAGCCAAAATGTCTGTCAATGTCAACCGC                                  |
| 8  | eIF5 wt stop AS XbaI               | TTATCTAGACCTTTAAATGGCATCAATATCG                                |
| 9  | eIF5 wt start S SacI               | ATAAGAGCTCGTTTAGTGAACCGCCAGCCAATGGGCAGTGAGG                    |
| 10 | eIF5 wt AS                         | AGACATTTTGGCTTATTAGTGG                                         |
| 11 | eIF5 uORF1 perfect AS<br>5' intron | AACCTTGATACTTACCGTTTTTCGTCAAATAAAGCCATGGTGGCAACGCTGCTCGCCCCGGG |
| 12 | eIF5 uORF1 perfect S<br>5' intron  | CCCCGGCGAGCAGCGTTGCCACCATGGCTTTATTTGACGAAAACGGTAAGTATCAAGGTT   |
| 13 | eIF5 uAUG1 S                       | GTAGGGGTTTATGTCCG                                              |
| 14 | eIF5 uAUG1 AS                      | GATCCGGACATAAACCCCTACTGCA                                      |
| 15 | eIF5 uAUG2 S                       | GTAGTTTTTTCATGTCCG                                             |
| 16 | eIF5 uAUG2 AS                      | GATCCGGACATGAAAACTACTGCA                                       |
| 17 | eIF5 uAUG3 S                       | GTAGTCGTTTATGTCCG                                              |
| 18 | eIF5 uAUG3 AS                      | GATCCGGACATAAACGACTACTGCA                                      |
| 19 | eIF5 mAUG S                        | GTAGGCCAAAATGTCCG                                              |
| 20 | eIF5 mAUG AS                       | GATCCGGACATTTTGGCCTACTGCA                                      |
| 21 | Optimal context S                  | GTAGGCCACCATGGCCG                                              |
| 22 | Optimal context A                  | GATCCGGCCATGGTGGCCTACTGCA                                      |
| 23 | GG/S in worst context              | GTAGTTTGTTATGGCCG                                              |
| 24 | GG/A in worst context              | GATCCGGCCATAACAACTACTGCA                                       |
| 25 | CG/S in worst context              | GTAGTTTCTTATGGCCG                                              |
| 26 | CG/A in worst context              | GATCCGGCCATAAGAACTACTGCA                                       |
| 27 | TG/S in worst context              | GTAGTTTTTTTATGGCCG                                             |
| 28 | TG/A in worst context              | GATCCGGCCATAAAAACTACTGCA                                       |
| 29 | AA/S in worst context              | GTAGTTTATTATGACCG                                              |
| 30 | AA/A in worst context              | GATCCGGTCATAATAAACTACTGCA                                      |
| 31 | AC/S in worst context              | GTAGTTTATTATGCCCCG                                             |
| 32 | AC/A in worst context              | GATCCGGGCATAATAAACTACTGCA                                      |
| 33 | AT/S in worst context              | GTAGTTTATTATGTCCG                                              |
| 34 | AT/A in worst context              | GATCCGGACATAATAAACTACTGCA                                      |
| 35 | GA/S in worst context              | GTAGTTTGTTATGACCG                                              |
| 36 | GA/A in worst context              | GATCCGGTCATAACAACTACTGCA                                       |
| 37 | GC/S in worst context              | GTAGTTTGTTATGCCCCG                                             |
| 38 | GC/A in worst context              | GATCCGGGCATAACAACTACTGCA                                       |
| 39 | GT/S in worst context              | GTAGTTTGTTATGTCCG                                              |
| 40 | GT/A in worst context              | GATCCGGACATAACAACTACTGCA                                       |

41 CA/S in worst context GTAGTTTCTTATGACCG  
42 CA/A in worst context GATCCGGTCATAAGAAACTACTGCA  
43 CC/S in worst context GTAGTTTCTTATGCCCG  
44 CC/A in worst context GATCCGGGCATAAGAAACTACTGCA  
45 CT/S in worst context GTAGTTTCTTATGTCCG  
46 CT/A in worst context GATCCGGACATAAGAAACTACTGCA  
47 TA/S in worst context GTAGTTTTTTATGACCG  
48 TA/A in worst context GATCCGGTCATAAAAAACTACTGCA  
49 TC/S in worst context GTAGTTTTTTATGCCCG  
50 TC/A in worst context GATCCGGGCATAAAAAACTACTGCA  
51 TT/S in worst context GTAGTTTTTTATGTCCG  
52 TT/A in worst context GATCCGGACATAAAAAACTACTGCA  
53 AG/S in worst context GTAGTTTATTATGGCCG  
54 AG/A in worst context GATCCGGCCATAATAAACTACTGCA
